# Supplementary material
Source: PubMed Central journal article supplement (PMC4456115)
Supplement: pro0024-1019-sd1.pdf [file pro0024-1019-sd1.pdf]

## Supplemental Material

### **Eliminating Antibody Polyreactivity through Addition of *N*-linked Glycosylation**

Gwo-Yu Chuang, Baoshan Zhang, Krisha McKee, Sijy O'Dell, Young Do Kwon, Tongqing Zhou, Julie Blinn, Krissey Lloyd, Robert Parks, Tarra Von Holle, Sung-Youl Ko, Wing-Pui Kong, Amarendra Pegu, Keyun Wang, Kavitha Baruah, Max Crispin, John R. Mascola, M. Anthony Moody, Barton F. Haynes, Ivelin S. Georgiev, and Peter D. Kwong

#### **Table of Contents**

##### Supplementary Figures

- Figure S1. HEp-2 cell staining results for VRC07-I30Q-S58N, VRC07, and Synagis (Palivizumab, an anti-RSV antibody) at antibody concentration of 25µg/ml.
- Figure S2. UPLC profile of Fab glycans for five designed VRC07 glycan constructs.
- Figure S3. UPLC profile of Fab glycans for the five designed VRC07 glycan constructs treated with different combinations of exoglycosidases.
- Figure S4. HEp-2 cell staining results at antibody concentration of 25µg/ml.
- Figure S5. Sera antibody concentration-time profile for each VRC07 variant in the mice PK study.
- Figure S6. ELISA binding curves for VRC07 variants towards RSC3 gp120 core.

- Figure S7. Cardiophilin reactivity of VRC07 variants.
- Figure S8. Luminex AtheNA Multi-Lyte ANA test results for each VRC07 variant.
- Figure S9. HEp-2 cell staining results at antibody concentration of 50 $\mu$ g/ml.
- Figure S10. Differential scanning calorimetry results.
- Figure S11. Computational protocol for designing *N*-linked glycan on the protein surface.

#### Supplementary Table

- Table S1. Reactivity of VRC07 variants towards cardiophilins evaluated by an anti-cardiophilin ELISA assay.
- Table S2. Reactivity of VRC07 variants against nine different autoantigens.
- Table S3. Neutralization IC<sub>50</sub> ( $\mu$ g/mL) of VRC07 variants against a panel of twenty different HIV-1 viruses.
- Table S4. AUC (Day\*( $\mu$ g/mL)) of VRC07 variants in the mice pharmacokinetics study.
- Table S5. Construct names, mutations, and C $\beta$  distances between polyreactive mutations and engineered glycans.
- Table S6. Reactivity of control VRC07 glycan variants toward cardiophilin evaluated by an anti-cardiophilin ELISA assay.
- Table S7. Reactivity of control VRC07 glycan variants toward nine different autoantigens.
- Table S8. Transitional temperatures of VRC07 variants determined by DSC.

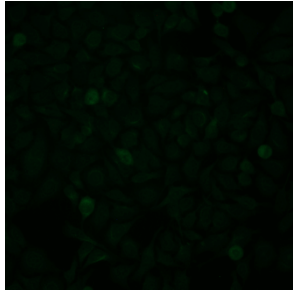

VRC07

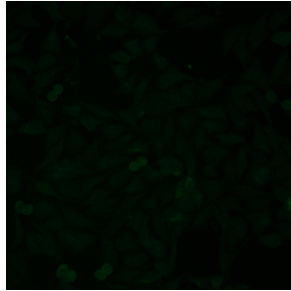

VRC07-I30Q<sub>HC</sub>-S58N<sub>HC</sub>

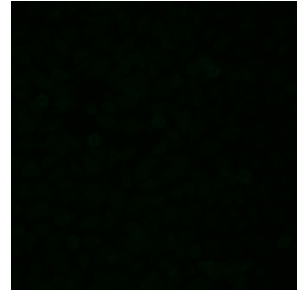

Synagis

**Figure S1. HEp-2 cell staining results for VRC07-I30Q-S58N, VRC07, and Synagis (Palivizumab, an anti-RSV antibody) at antibody concentration of 25µg/ml.**

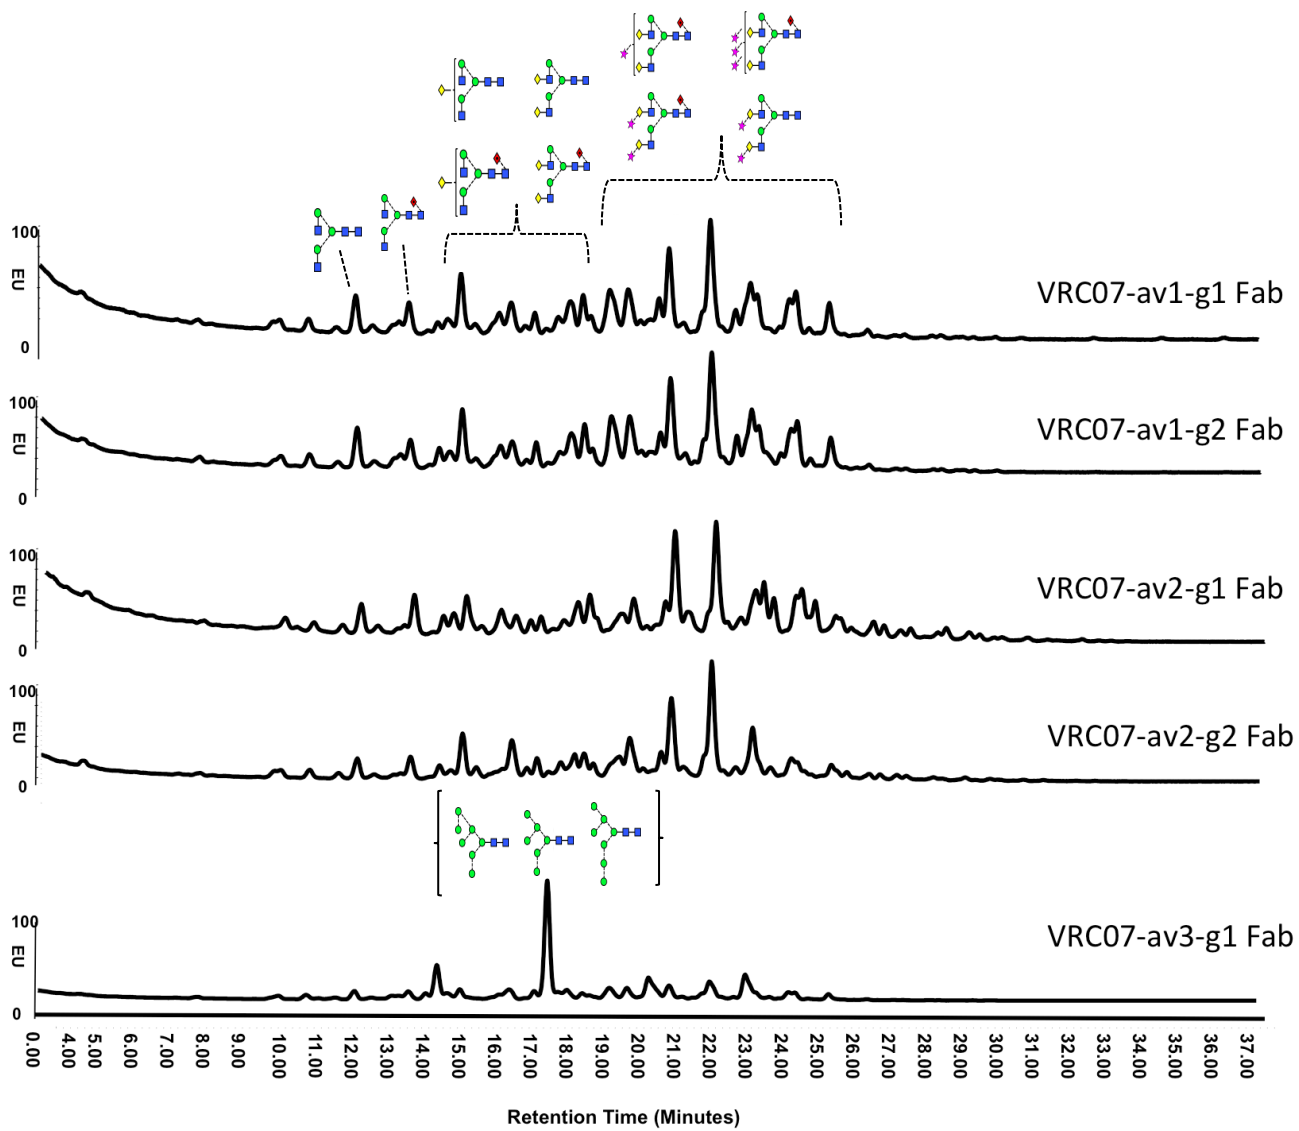

■ N Acetyl Glucosamine  
 ◆ Fucose  
 ● Mannose  
 ◆ Galactose  
 ★ N-Acetyl Neuraminic acid

**Figure S2. UPLC profile of Fab glycans for five designed VRC07 glycan constructs.**

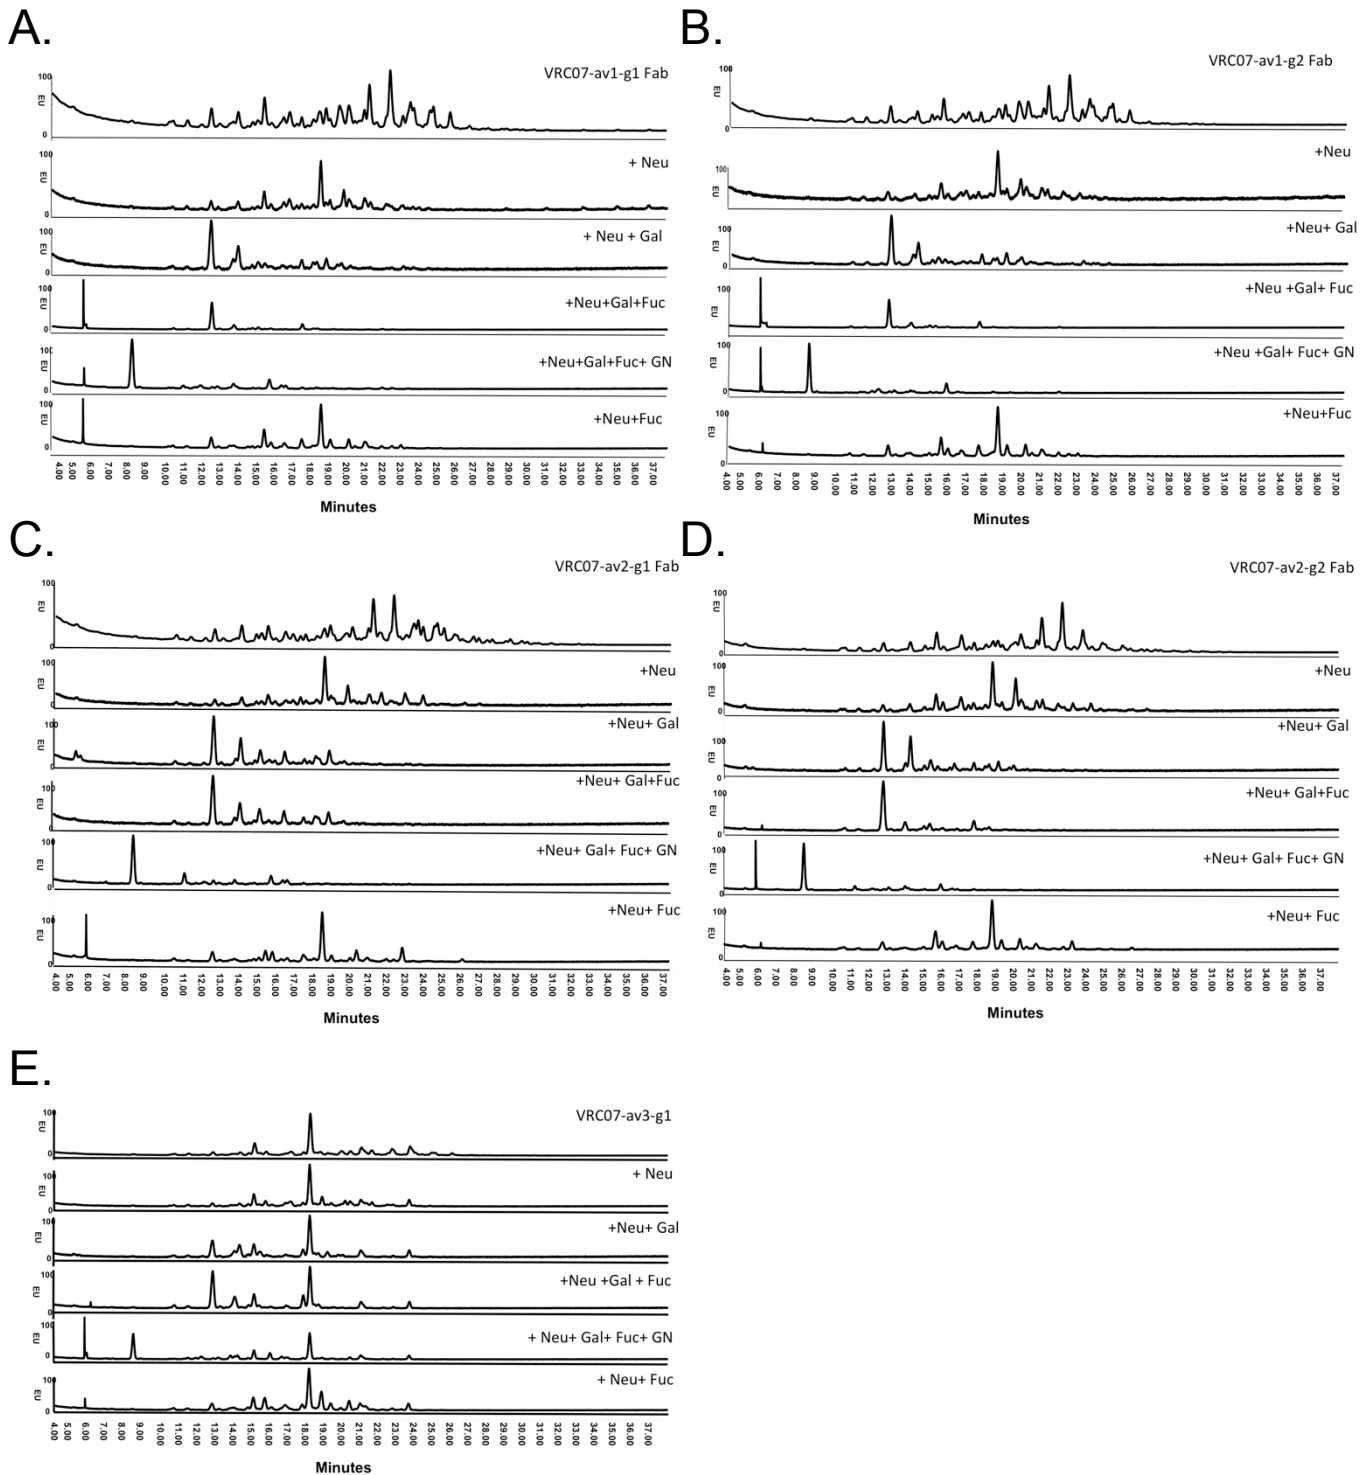

**Figure S3. UPLC profile of Fab glycans for the five designed VRC07 glycan constructs treated with different combinations of exoglycosidases. (A) VRC07-av1-g1 (B) VRC07-av1-g2 (C) VRC07-av2-g1 (D) VRC07-av2-g2 (E) VRC07-av3-g3. Abbreviations: Neu: N-acetyl neuraminidase; Gal: Beta galactosidase; Fuc: Alpha fucosidase; GN: N-acetyl glucanosaminidase.**

Polyreactive VRC07 variants

Single glycan added to polyreactive VRC07 variants

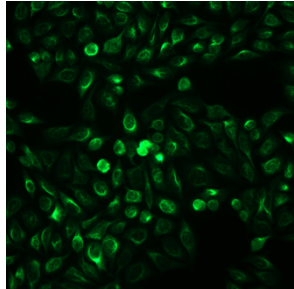

VRC07-av1

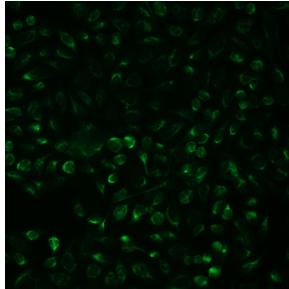

VRC07-av1-g1

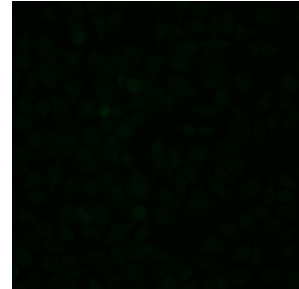

VRC07-av1-g2

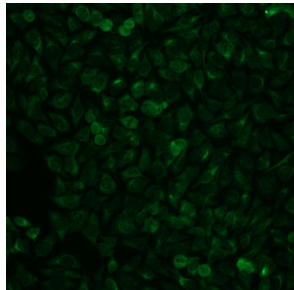

VRC07-av2

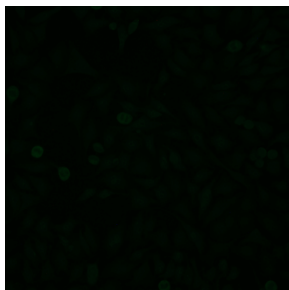

VRC07-av2-g1

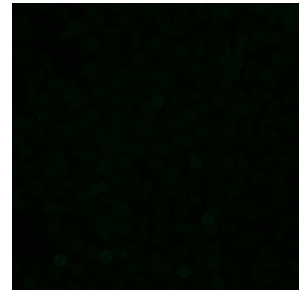

VRC07-av2-g2

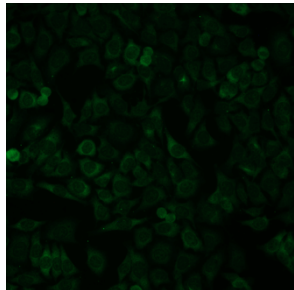

VRC07-av3

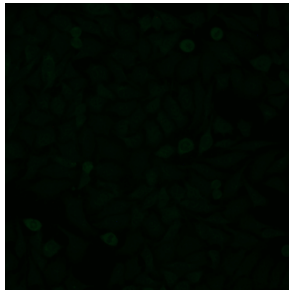

VRC07-av3-g1

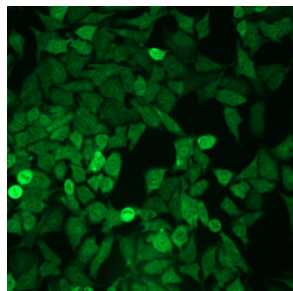

2F5

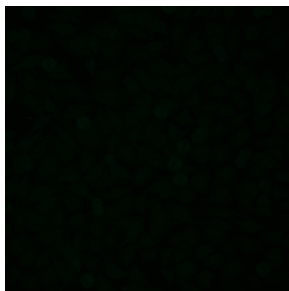

Synagis

**Figure S4. HEp-2 cell staining results at antibody concentration of 25µg/ml.** Synagis, an anti-RSV monoclonal antibody, was used as the negative control. 2F5, a polyreactive HIV-1 antibody, was used as the positive control.

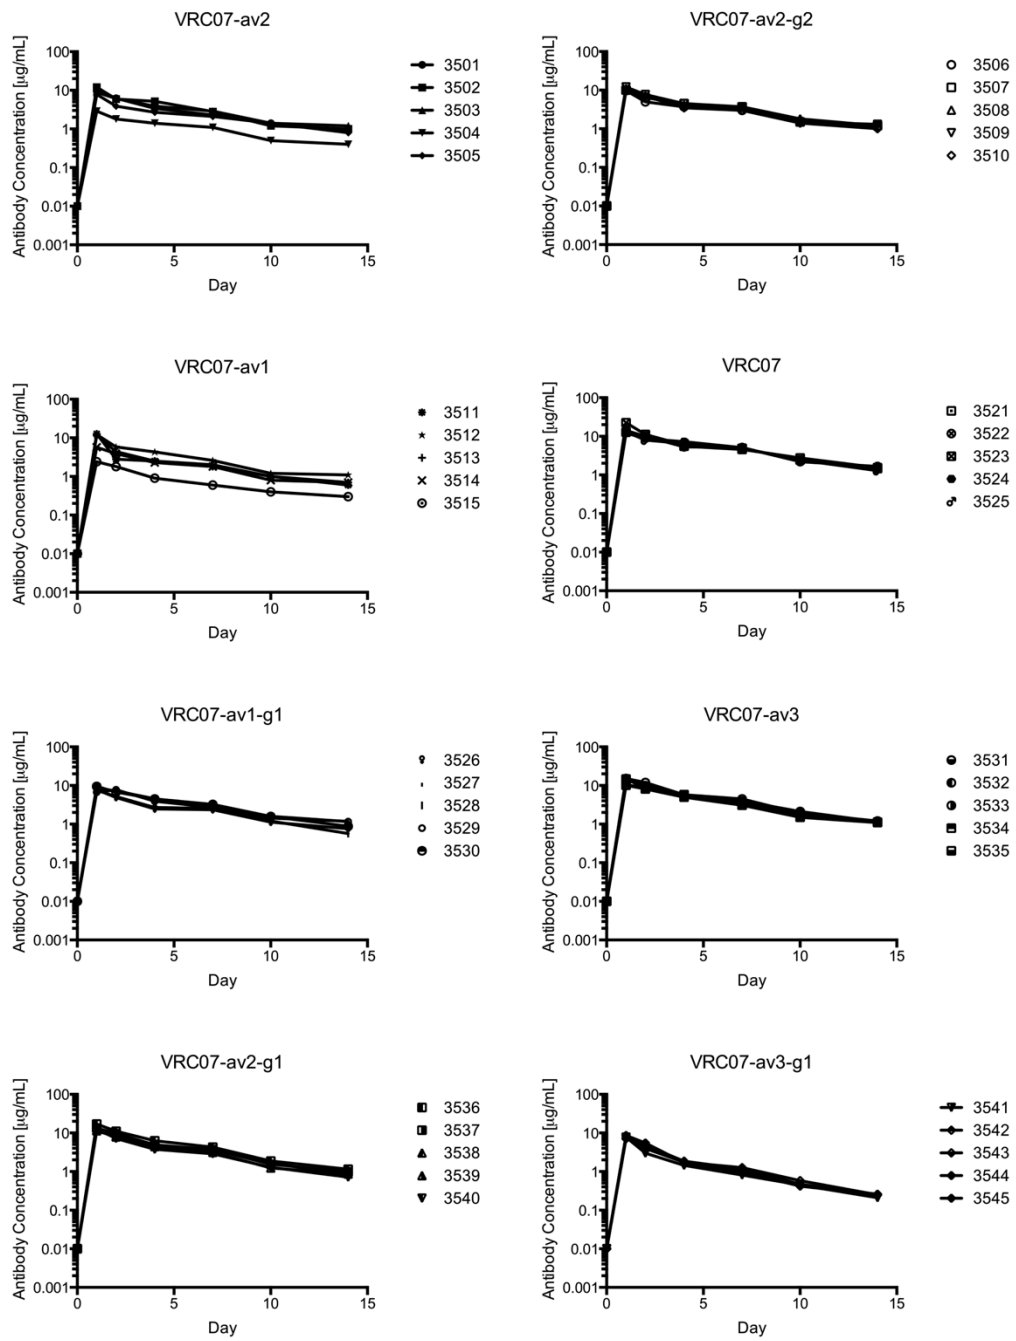

**Figure S5. Sera antibody concentration-time profile for each VRC07 variant in the mice PK study.**

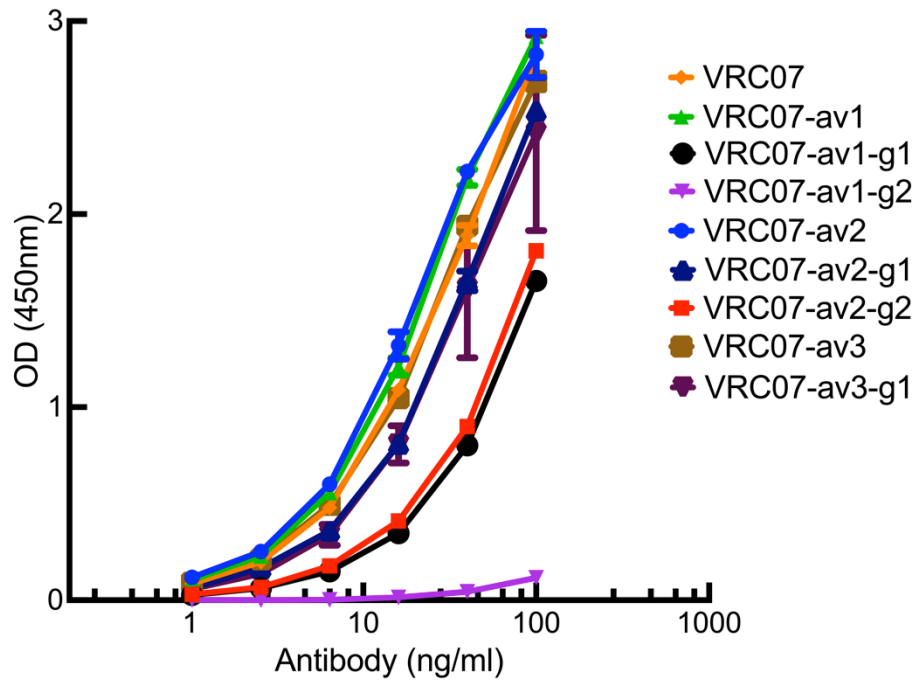

**Figure S6. ELISA binding curves for VRC07 variants towards RSC3 gp120 core.**



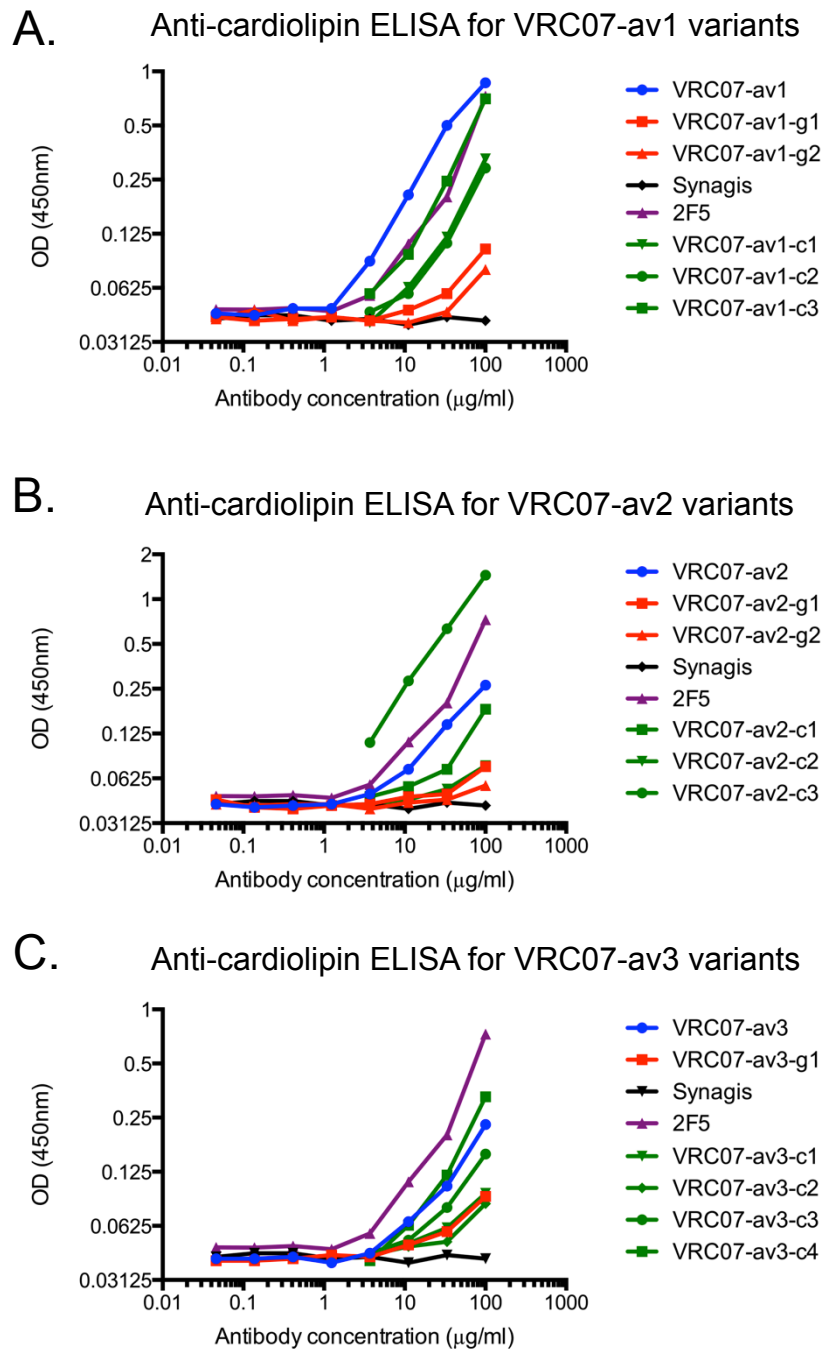

**Figure S7. Cardiolipin reactivity of VRC07 variants.** Shown is the cardiolipin ELISA results at different antibody concentrations for (A) VRC07-av1 and its glycan mutants (B) VRC07-av2 and its glycan mutants, and (C) VRC07-av3 and its glycan mutant. Synagis (Palivizumab), an anti-RSV monoclonal antibody, was used as a negative control. 2F5, a polyreactive HIV-1 antibody, was used as the positive control.

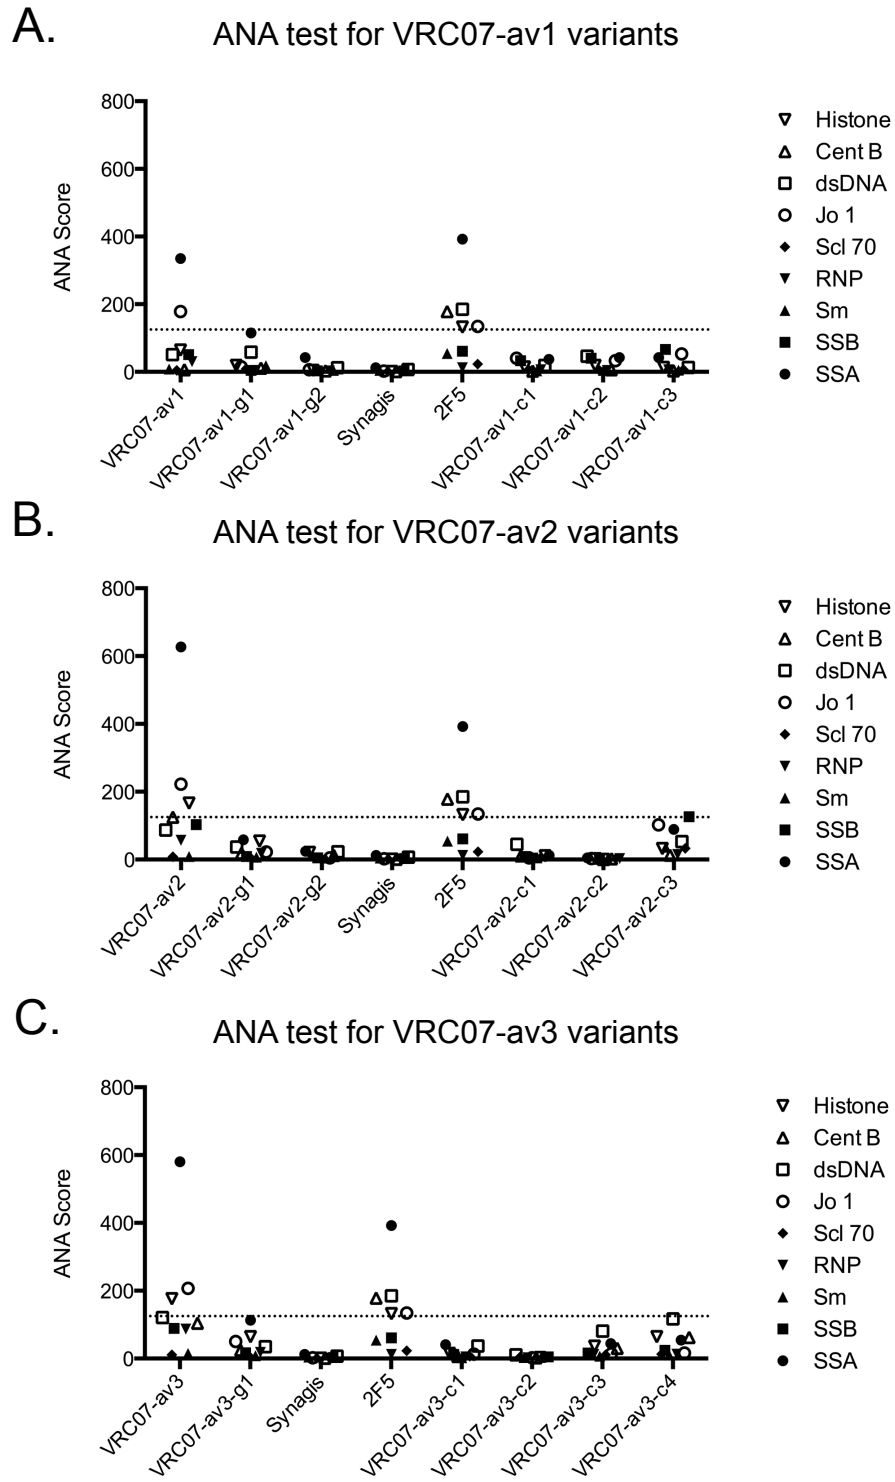

**Figure S8. Luminex Athena Multi-Lyte ANA test results for each VRC07 variant.** Shown is the Athena ANA results for (A) VRC07-av1 and its glycan mutants (B) VRC07-av2 and its glycan mutants, and (C) VRC07-av3 and its glycan mutant. The horizontal dash line indicates an ANA score cutoff of 125. Synagis (Palivizumab), an anti-RSV monoclonal antibody, was used as a negative control. 2F5, a polyreactive HIV-1 antibody, was used as the positive control.

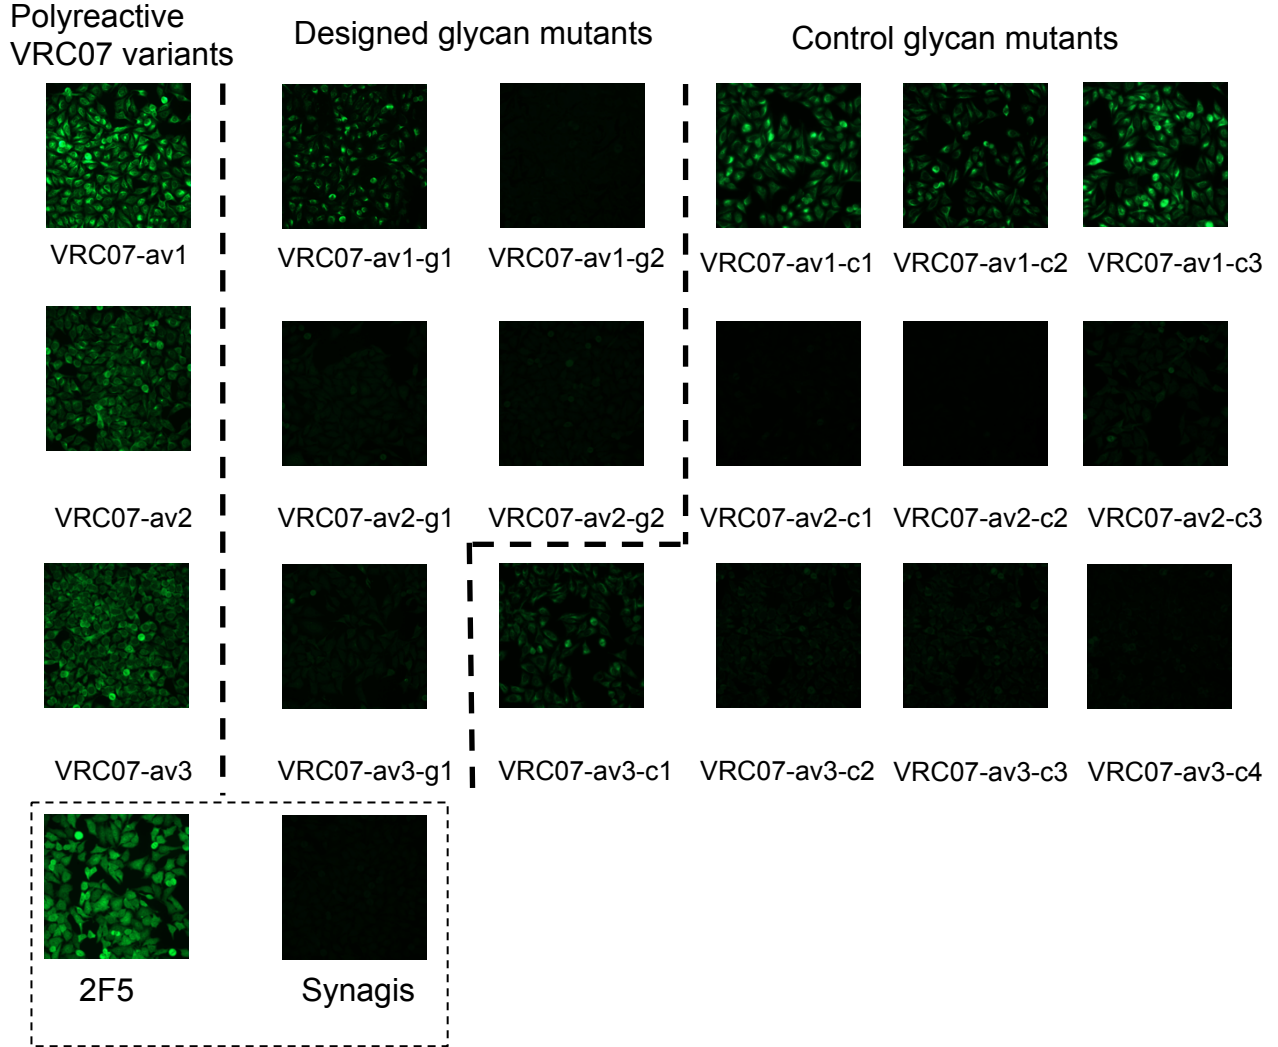

**Figure S9. HEp-2 cell staining results at antibody concentration of 50µg/ml.** Synagis, an anti-RSV monoclonal antibody, was used as the negative control. 2F5, a polyreactive HIV-1 antibody, was used as the positive control.

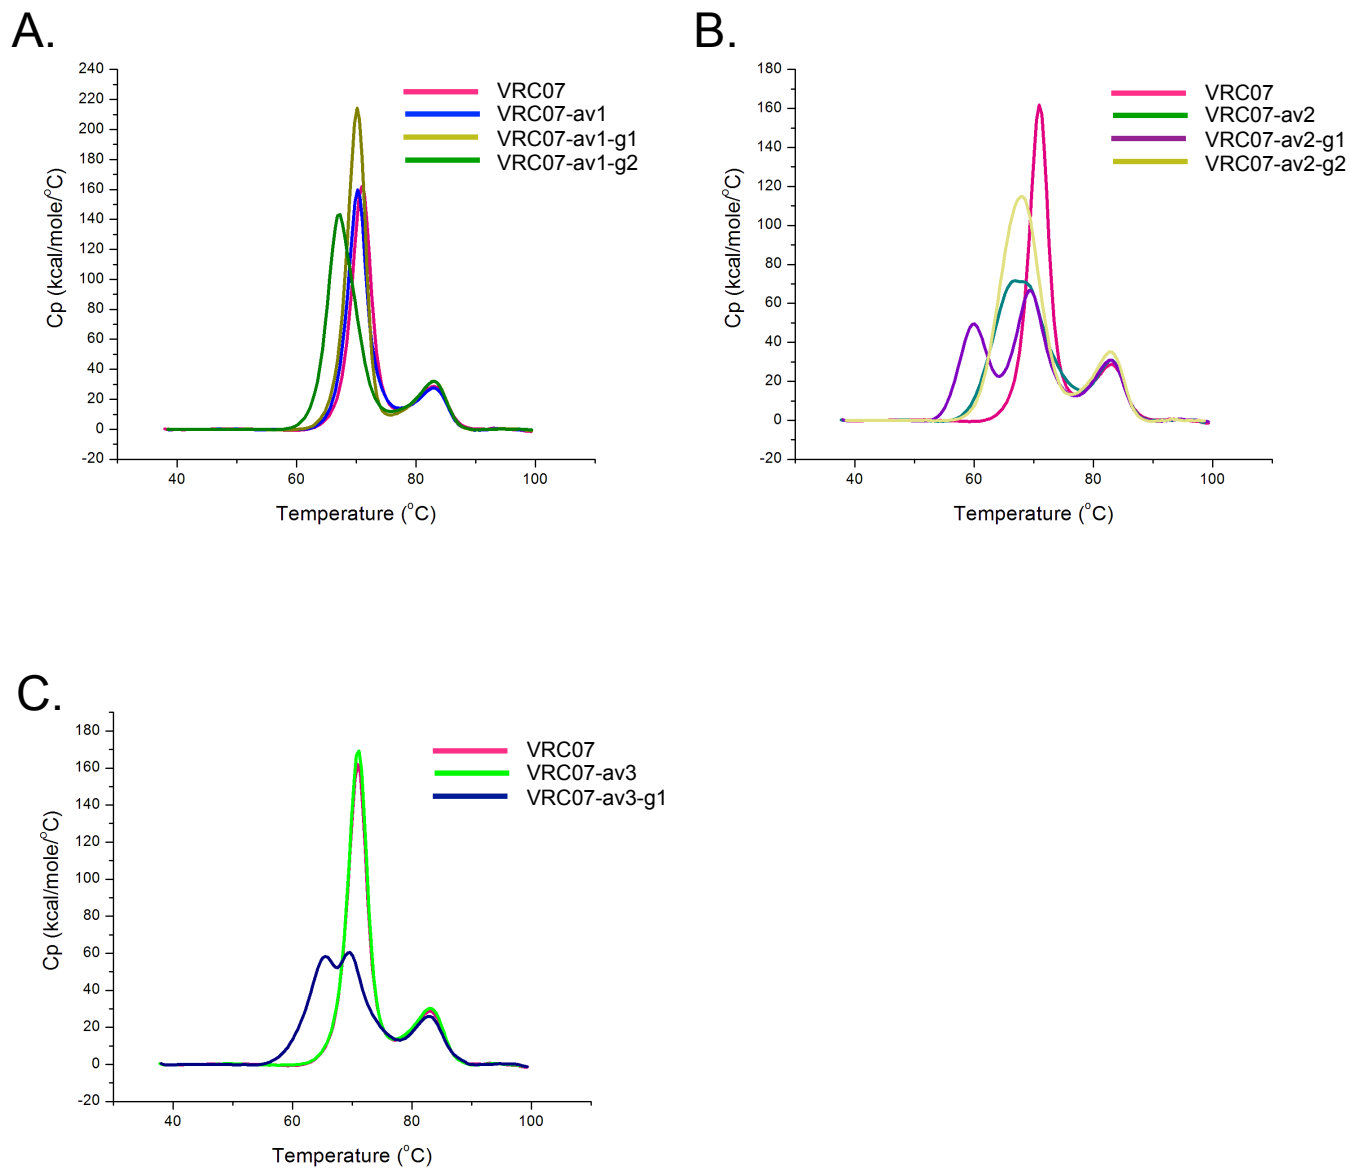

**Figure S10. Differential scanning calorimetry results.** (A) VRC07, VRC07-av1 and its glycan mutants, (B) VRC07, VRC07-av2 and its glycan mutants, and (C) VRC07, VRC07-av3 and its glycan mutants.

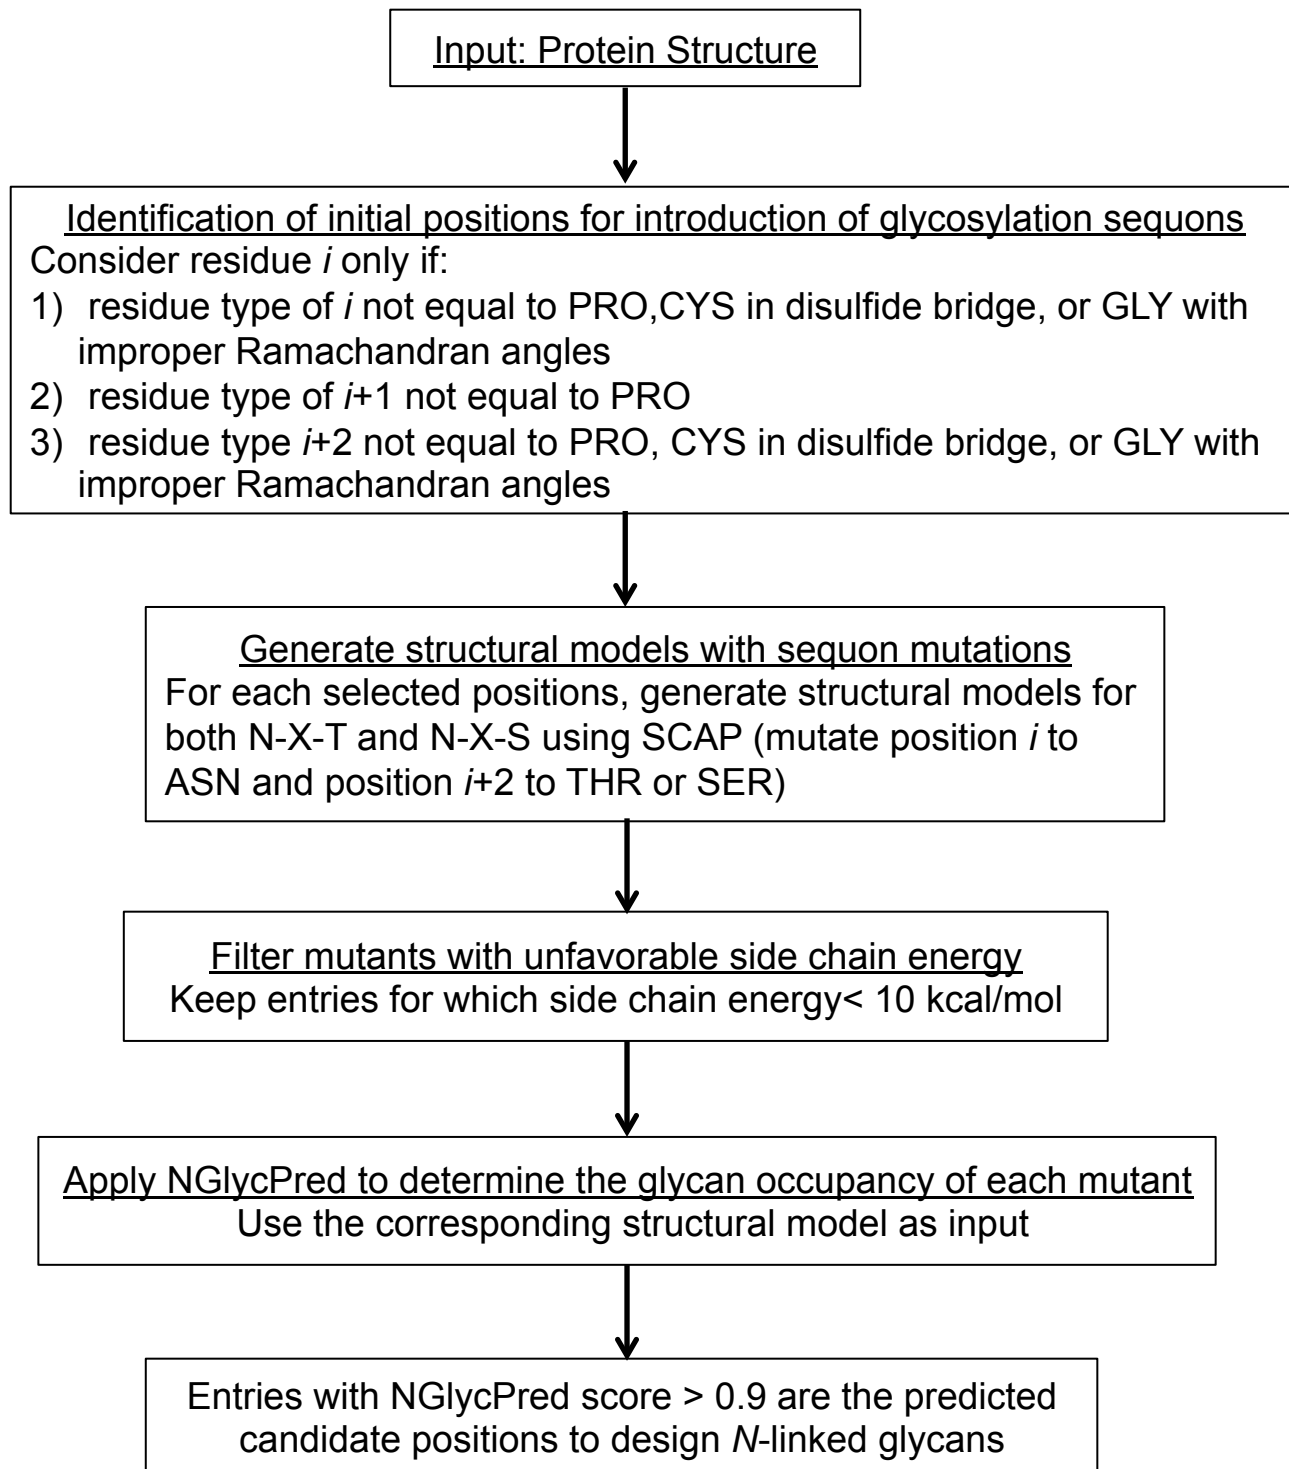

**Figure S11. Computational protocol for designing *N*-linked glycan on the protein surface.**

**Table S1. Reactivity of VRC07 variants towards cardiolipins evaluated by an anti-cardiolipin ELISA assay.**

|                 | Antibody Concentration ( $\mu\text{g/ml}$ ) |        |        |       |       |       |       |       |
|-----------------|---------------------------------------------|--------|--------|-------|-------|-------|-------|-------|
|                 | 100                                         | 33.333 | 11.111 | 3.704 | 1.235 | 0.412 | 0.137 | 0.046 |
| VRC07-av1       | 0.865                                       | 0.500  | 0.206  | 0.088 | 0.048 | 0.048 | 0.044 | 0.045 |
| VRC07-av1-g1    | 0.103                                       | 0.058  | 0.047  | 0.041 | 0.043 | 0.042 | 0.041 | 0.043 |
| VRC07-av1-g2    | 0.079                                       | 0.046  | 0.040  | 0.041 | 0.043 | 0.041 | 0.047 | 0.042 |
| VRC07-av2       | 0.264                                       | 0.144  | 0.072  | 0.049 | 0.042 | 0.041 | 0.040 | 0.042 |
| VRC07-av2-g1    | 0.075                                       | 0.049  | 0.047  | 0.042 | 0.041 | 0.039 | 0.040 | 0.045 |
| VRC07-av2-g2    | 0.056                                       | 0.045  | 0.043  | 0.039 | 0.042 | 0.042 | 0.041 | 0.042 |
| VRC07-av3       | 0.229                                       | 0.104  | 0.066  | 0.044 | 0.039 | 0.042 | 0.041 | 0.041 |
| VRC07-av3-g1    | 0.091                                       | 0.058  | 0.049  | 0.042 | 0.043 | 0.041 | 0.040 | 0.040 |
| VRC07           | 0.117                                       | 0.063  | 0.050  | 0.046 | 0.042 | 0.044 | 0.039 | 0.040 |
| VRC07-I30Q-S58N | 0.069                                       | 0.048  | 0.044  | 0.041 | 0.041 | 0.041 | 0.041 | 0.041 |
| 2F5             | 0.729                                       | 0.201  | 0.110  | 0.057 | 0.046 | 0.048 | 0.047 | 0.048 |
| Synagis         | 0.041                                       | 0.043  | 0.039  | 0.042 | 0.041 | 0.044 | 0.044 | 0.042 |

An anti-RSV monoclonal antibody, Synagis (Palivizumab), was used as a negative control. 2F5, a polyreactive HIV-1 antibody, was used as a positive control. VRC07 and VRC07-I30Q-S58N were included in the assay for comparison. OD (450 nm) Values of equal to or greater than three fold of the background ELISA signal (0.0421) are highlighted red.

**Table S2. Reactivity of VRC07 variants against nine different autoantigens.**

| Abs                    | µg/ml | SSA        | SSB        | Sm         | RNP        | Scl 70     | Jo 1       | dsDNA       | Cent B     | Histone    |
|------------------------|-------|------------|------------|------------|------------|------------|------------|-------------|------------|------------|
| <b>Neg Control</b>     |       | -          | -          | -          | -          | -          | -          | -           | -          | -          |
| <b>Pos Control 1</b>   |       | <b>860</b> | <b>520</b> |            |            |            |            |             | <b>244</b> |            |
| <b>Pos Control 2</b>   |       |            |            |            |            |            | <b>259</b> | <b>1514</b> |            | <b>766</b> |
| <b>Pos Control 3</b>   |       |            |            | <b>826</b> | <b>285</b> | <b>363</b> |            |             |            |            |
| <b>VRC07-av1</b>       | 50    | <b>335</b> | 51         | 8          | 30         | 4          | <b>178</b> | 51          | 6          | 64         |
|                        | 25    | <b>211</b> | 33         | 5          | 20         | 2          | 124        | 19          | 3          | 42         |
|                        | 12.5  | <b>138</b> | 22         | 4          | 13         | 2          | 88         | 15          | 3          | 32         |
|                        | 6.25  | 107        | 15         | 5          | 11         | 2          | 69         | 15          | 2          | 29         |
| <b>VRC07-av1-g1</b>    | 50    | 115        | 4          | 18         | 4          | 9          | 15         | 58          | 11         | 19         |
|                        | 25    | 75         | 5          | 6          | 3          | 5          | 9          | 27          | 5          | 11         |
|                        | 12.5  | 54         | 5          | 5          | 2          | 4          | 5          | 15          | 3          | 7          |
|                        | 6.25  | 28         | 2          | 3          | 2          | 3          | 7          | 8           | 1          | 5          |
| <b>VRC07-av1-g2</b>    | 50    | 42         | 3          | 4          | 3          | 2          | 6          | 12          | 3          | 4          |
|                        | 25    | 16         | 2          | 5          | 1          | 1          | 5          | 3           | 2          | 2          |
|                        | 12.5  | 16         | 3          | 3          | 2          | 2          | 3          | 5           | 0          | 2          |
|                        | 6.25  | 10         | 3          | 4          | 0          | 1          | 4          | 0           | 1          | 3          |
| <b>VRC07-av2</b>       | 50    | <b>627</b> | 103        | 9          | 57         | 8          | <b>222</b> | 87          | 125        | <b>166</b> |
|                        | 25    | <b>491</b> | 82         | 6          | 50         | 5          | <b>155</b> | 74          | 111        | <b>161</b> |
|                        | 12.5  | <b>390</b> | 56         | 7          | 46         | 5          | 106        | 62          | 76         | <b>133</b> |
|                        | 6.25  | <b>297</b> | 37         | 4          | 41         | 4          | 70         | 53          | 54         | 114        |
| <b>VRC07-av2-g1</b>    | 50    | 58         | 9          | 7          | 18         | 2          | 22         | 37          | 19         | 54         |
|                        | 25    | 33         | 6          | 5          | 10         | 2          | 11         | 21          | 8          | 29         |
|                        | 12.5  | 17         | 5          | 4          | 6          | 2          | 5          | 16          | 5          | 20         |
|                        | 6.25  | 18         | 4          | 2          | 5          | 2          | 6          | 14          | 4          | 11         |
| <b>VRC07-av2-g2</b>    | 50    | 24         | 5          | 4          | 5          | 2          | 5          | 23          | 12         | 21         |
|                        | 25    | 18         | 3          | 5          | 2          | 1          | 6          | 10          | 7          | 12         |
|                        | 12.5  | 12         | 2          | 2          | 3          | 2          | 4          | 7           | 3          | 7          |
|                        | 6.25  | 11         | 5          | 3          | 2          | 2          | 2          | 3           | 3          | 6          |
| <b>VRC07-av3</b>       | 50    | <b>580</b> | 89         | 15         | 87         | 11         | <b>207</b> | 121         | 104        | <b>176</b> |
|                        | 25    | <b>427</b> | 68         | 7          | 71         | 7          | <b>153</b> | 111         | 95         | <b>170</b> |
|                        | 12.5  | <b>336</b> | 52         | 4          | 61         | 6          | 110        | 92          | 73         | <b>146</b> |
|                        | 6.25  | <b>238</b> | 40         | 5          | 60         | 6          | 84         | 83          | 55         | <b>131</b> |
| <b>VRC07-av3-g1</b>    | 50    | 113        | 17         | 8          | 18         | 3          | 50         | 35          | 25         | 64         |
|                        | 25    | 54         | 7          | 5          | 12         | 2          | 22         | 20          | 11         | 40         |
|                        | 12.5  | 25         | 6          | 4          | 9          | 2          | 12         | 17          | 7          | 26         |
|                        | 6.25  | 22         | 5          | 3          | 5          | 2          | 10         | 11          | 3          | 16         |
| <b>VRC07</b>           | 247   | 27         | 7          | 54         | 5          | 85         | 88         | 48          | 98         | <b>247</b> |
|                        | 127   | 13         | 5          | 43         | 4          | 43         | 59         | 22          | 74         | <b>127</b> |
|                        | 62    | 9          | 6          | 33         | 4          | 20         | 41         | 12          | 51         | 62         |
|                        | 34    | 4          | 3          | 21         | 2          | 11         | 37         | 7           | 36         | 34         |
| <b>VRC07-I30Q-S58N</b> | 50    | 117        | 12         | 5          | 25         | 3          | 43         | 47          | 10         | 61         |
|                        | 25    | 61         | 8          | 4          | 20         | 3          | 19         | 37          | 6          | 47         |
|                        | 12.5  | 31         | 5          | 2          | 13         | 3          | 11         | 32          | 3          | 30         |
|                        | 6.25  | 25         | 4          | 3          | 8          | 2          | 5          | 14          | 2          | 18         |
| <b>Synagis</b>         | 50    | 12         | 3          | 4          | 1          | 1          | 2          | 7           | 1          | 1          |
|                        | 25    | 10         | 2          | 2          | 1          | 1          | 2          | 0           | 0          | 1          |
|                        | 12.5  | 8          | 3          | 4          | 1          | 1          | 4          | 0           | 1          | 2          |
|                        | 6.25  | 15         | 1          | 6          | 0          | 0          | 3          | 0           | 1          | 1          |
| <b>2F5</b>             | 50    | <b>392</b> | 61         | 54         | 12         | 23         | <b>134</b> | <b>185</b>  | <b>178</b> | <b>132</b> |
|                        | 25    | <b>194</b> | 25         | 20         | 4          | 6          | 54         | 119         | 95         | 66         |
|                        | 12.5  | 111        | 15         | 12         | 2          | 3          | 33         | 75          | 54         | 40         |
|                        | 6.25  | 70         | 12         | 9          | 2          | 2          | 21         | 32          | 36         | 25         |

Reactivity of autoreactive VRC07 variants and glycan mutants with autoantigens was detected by the Luminex assay. An anti-RSV monoclonal antibody, Synagis (Palivizumab), was used as a negative control. 2F5, a polyreactive HIV-1 antibody, was used as a positive control. VRC07 and VRC07-I30Q-S58N were included in the assay for comparison. SSA, Sjogren's syndrome antigen A; SSB, Sjogren syndrome antigen B; Sm, Smith antigen; RNP, ribonucleoprotein; Scl 70, scleroderma 70; Jo1, antigen; CentrB, centromere B. Values of greater than 125 are highlighted red.

**Table S3. Neutralization IC<sub>50</sub> (µg/mL) of VRC07 variants against a panel of twenty different HIV-1 viruses.**

| clade                           | virus           | VRC07-<br>av1 | VRC07-<br>av1-g1 | VRC07-<br>av1-g2 | VRC07-<br>av2 | VRC07-<br>av2-g1 | VRC07-<br>av2-g2 | VRC07-<br>av3 | VRC07-<br>av3-g1 | VRC07  |
|---------------------------------|-----------------|---------------|------------------|------------------|---------------|------------------|------------------|---------------|------------------|--------|
| A                               | KER2008.12.SG3  | 0.256         | >50              | >50              | 0.188         | 0.656            | 7.170            | 0.446         | 2.270            | 0.585  |
| A                               | Q23.17.SG3      | 0.064         | 3.48             | 37.4             | 0.07          | 0.072            | 0.2              | 0.073         | 0.208            | 0.074  |
| A                               | UG037.8.SG3     | 0.051         | 2.83             | 36               | 0.054         | 0.068            | 0.112            | 0.075         | 0.153            | 0.045  |
| AG                              | 242-14.SG3      | 0.091         | >50              | >50              | 0.712         | 21.000           | >50              | 1.590         | 20.100           | 2.840  |
| B                               | 7165.18.SG3     | 1.590         | >50              | >50              | 1.030         | 7.470            | >50              | 3.720         | 16.000           | 4.340  |
| B                               | AC10.29.SG3     | 0.529         | 16.8             | >50              | 0.515         | 0.355            | 2.89             | 0.536         | 0.382            | 0.684  |
| B                               | BG1168.01.SG3   | 0.044         | >50              | >50              | 0.087         | 1.580            | >50              | 0.093         | 0.880            | 0.141  |
| B                               | BL01.DG.SG3     | >50           | >50              | >50              | >50           | >50              | >50              | >50           | >50              | >50    |
| B                               | JRFLJB.SG3      | 0.013         | 0.454            | >50              | 0.006         | 0.018            | 0.086            | 0.006         | 0.041            | 0.005  |
| B                               | YU2.DG.SG3      | 0.010         | 3.210            | >50              | 0.006         | 0.018            | 0.038            | 0.012         | 0.030            | 0.014  |
| C                               | 6631.V3.C10.SG3 | 0.282         | >50              | >50              | 2.920         | >50              | >50              | 9.480         | >50              | 14.400 |
| C                               | CAP210.E8.SG3   | 7.800         | >50              | >50              | 27.100        | >50              | >50              | >50           | >50              | >50    |
| C                               | DU151.02.SG3    | 0.149         | 14.2             | >50              | 1.64          | 3.6              | >50              | 1.65          | 3                | 4.37   |
| C                               | DU172.17.SG3    | 0.055         | 27.800           | >50              | 1.570         | 17.400           | >50              | 0.264         | 1.250            | 0.338  |
| C                               | DU422.01.SG3    | >50           | >50              | >50              | >50           | >50              | >50              | >50           | >50              | >50    |
| C                               | TV1.29.SG3      | 0.542         | >50              | >50              | >50           | >50              | >50              | >50           | >50              | >50    |
| C                               | TZA125.17.SG3   | 0.493         | >50              | >50              | >50           | >50              | >50              | 9.690         | >50              | 22.000 |
| C                               | ZM106.9.SG3     | 0.12          | 5.590            | >50              | 0.146         | 0.111            | 1.590            | 0.167         | 0.126            | 0.119  |
| C                               | ZM53.12.SG3     | 0.518         | 21               | >50              | 0.385         | 0.266            | 1.8              | 0.258         | 0.324            | 0.405  |
| D                               | 57128.vrc15.SG3 | 0.267         | >50              | >50              | 0.441         | 1.970            | >50              | 1.020         | 2.270            | 1.460  |
| <b># of Viruses Neutralized</b> |                 | 18            | 9                | 2                | 16            | 14               | 8                | 16            | 14               | 16     |
| <b>Median IC50</b>              |                 | 0.262         | 50.000           | 50.000           | 0.614         | 2.785            | 50.000           | 0.778         | 2.270            | 1.072  |
| <b>Geometric Mean</b>           |                 | 0.311         | 19.357           | 48.477           | 0.834         | 2.167            | 7.966            | 0.972         | 2.431            | 1.192  |

\* A value of 50 was used to calculate the median and geometric for entries with IC<sub>50</sub> greater than 50.



**Table S4. AUC (Day\*( $\mu\text{g}/\text{mL}$ )) of VRC07 variants in the mice pharmacokinetics study.**

| <b>Antibody</b> | <b>VRC07</b> | <b>VRC07-<br/>av1</b> | <b>VRC07-<br/>av1-g1</b> | <b>VRC07-<br/>av2</b> | <b>VRC07-<br/>av2-g1</b> | <b>VRC07-<br/>av2-g2</b> | <b>VRC07-<br/>av3</b> | <b>VRC07-<br/>av3-g1</b> |
|-----------------|--------------|-----------------------|--------------------------|-----------------------|--------------------------|--------------------------|-----------------------|--------------------------|
|                 | 75.95        | 61.46                 | 40.22                    | 48.13                 | 83.96                    | 53.26                    | 79.54                 | 30.36                    |
|                 | 79.01        | 58.84                 | 51.33                    | 60.79                 | 67.98                    | 57.57                    | 62.72                 | 32.02                    |
|                 | 103.07       | 50.76                 | 40.49                    | 50.20                 | 62.35                    | 59.86                    | 72.98                 | 32.50                    |
|                 | 78.24        | 31.12                 | 47.68                    | 17.24                 | 58.10                    | 62.29                    | 57.88                 | 28.74                    |
|                 | 78.03        | 12.76                 | 54.48                    | 41.11                 | 58.54                    | 54.02                    | 74.12                 | 32.79                    |
| <b>Average</b>  | <b>82.86</b> | <b>42.99</b>          | <b>46.84</b>             | <b>43.49</b>          | <b>66.19</b>             | <b>57.40</b>             | <b>69.45</b>          | <b>31.28</b>             |
| <b>SE</b>       | <b>5.08</b>  | <b>9.24</b>           | <b>2.86</b>              | <b>7.28</b>           | <b>4.78</b>              | <b>1.71</b>              | <b>3.97</b>           | <b>0.76</b>              |

\* SE: standard error

**Table S5. Construct names, mutations, and C<sub>β</sub> distances between polyreactive mutations and engineered glycans.**

| Construct Name | Heavy Chain Mutations | Light Chain Mutations     | C <sub>β</sub> Distances (Å) |
|----------------|-----------------------|---------------------------|------------------------------|
| VRC07-av1-c1   | G54W-I30Q-S58N        | R24N                      | 37.7 <sup>a</sup>            |
| VRC07-av1-c2   | G54W-I30Q-S58N        | S26N-Y28T                 | 33.5 <sup>a</sup>            |
| VRC07-av1-c3   | G54W-I30Q-S58N        | R45N-V47T                 | 30.8 <sup>a</sup>            |
| VRC07-av2-c1   | M73N-S75T             | AAAA N terminus           | 35.6 <sup>b</sup>            |
| VRC07-av2-c2   | R71N-M73T             | AAAA N terminus           | 29.8 <sup>b</sup>            |
| VRC07-av2-c3   | -                     | AAAA N terminus-R45N-V47T | 23.3 <sup>b</sup>            |
| VRC07-av3-c1   | M73N-S75T             | A43R                      | 25.3 <sup>c</sup>            |
| VRC07-av3-c2   | R71N-M73T             | A43R                      | 20.7 <sup>c</sup>            |
| VRC07-av3-c3   | -                     | A43R- R24N                | 26.2 <sup>c</sup>            |
| VRC07-av3-c4   | -                     | A43R-S26N-Y28T            | 25.3 <sup>c</sup>            |

<sup>a</sup> C<sub>β</sub> distance between HC W54 and engineered glycan. <sup>b</sup> C<sub>β</sub> distance between LC A3 and engineered glycan. <sup>c</sup> C<sub>β</sub> distance between LC A43 and engineered glycan.

**Table S6. Reactivity of control VRC07 glycan variants toward cardiolipin evaluated by an anti-cardiolipin ELISA assay.**

|                | Antibody Concentration ( $\mu\text{g/ml}$ ) |        |        |       |
|----------------|---------------------------------------------|--------|--------|-------|
|                | 100                                         | 33.333 | 11.111 | 3.704 |
| VRC07-av1-c1   | 0.327                                       | 0.120  | 0.063  | 0.040 |
| VRC07-av1-c2   | 0.290                                       | 0.111  | 0.058  | 0.046 |
| VRC07-av1-c3   | 0.704                                       | 0.245  | 0.096  | 0.058 |
| VRC07-av2-c1   | 0.182                                       | 0.072  | 0.055  | 0.047 |
| VRC07-av2-c2   | 0.076                                       | 0.053  | 0.045  | 0.041 |
| VRC07-av2-c3   | 1.451                                       | 0.634  | 0.282  | 0.109 |
| VRC07-av3-c1   | 0.095                                       | 0.061  | 0.050  | 0.042 |
| VRC07-av3-c2   | 0.083                                       | 0.051  | 0.048  | 0.043 |
| VRC07-av3-c3   | 0.157                                       | 0.079  | 0.052  | 0.044 |
| VRC07-av3-c4   | 0.327                                       | 0.120  | 0.063  | 0.040 |
| <b>Synagis</b> | 0.042                                       | 0.045  | NA     | NA    |

An anti-RSV monoclonal antibody, Synagis (Palivizumab), was used as a negative control. OD (450 nm) Values of equal to or greater than three fold of the background ELISA signal (0.05) are highlighted red. NA: not available.

**Table S7. Reactivity of control VRC07 glycan variants toward nine different autoantigens.**

| Abs                  | µg/ml | SSA | SSB | Sm  | RNP | Scl 70 | Jo 1 | dsDNA | Cent B | Histone |
|----------------------|-------|-----|-----|-----|-----|--------|------|-------|--------|---------|
| <b>Neg Control</b>   |       | -   | -   | -   | -   | -      | -    | -     | -      | -       |
| <b>Pos Control 1</b> |       |     |     |     |     |        |      |       | 288    |         |
| <b>Pos Control 2</b> |       | 901 | 970 |     |     |        | 347  | 565   |        | 292     |
| <b>Pos Control 3</b> |       |     |     | 467 | 479 | 355    |      |       |        |         |
| <b>VRC07-av1-c1</b>  | 50    | 37  | 33  | 3   | 6   | 6      | 40   | 19    | 2      | 14      |
|                      | 25    | 23  | 21  | 2   | 4   | 3      | 24   | 15    | 1      | 11      |
|                      | 12.5  | 15  | 13  | 2   | 3   | 4      | 12   | 10    | 2      | 7       |
|                      | 6.25  | 13  | 8   | 2   | 3   | 2      | 9    | 12    | 1      | 7       |
| <b>VRC07-av1-c2</b>  | 50    | 42  | 40  | 4   | 4   | 5      | 33   | 46    | 6      | 19      |
|                      | 25    | 19  | 18  | 3   | 3   | 4      | 14   | 28    | 3      | 10      |
|                      | 12.5  | 12  | 11  | 3   | 2   | 2      | 9    | 19    | 3      | 7       |
|                      | 6.25  | 8   | 7   | 2   | 2   | 1      | 6    | 13    | 1      | 5       |
| <b>VRC07-av1-c3</b>  | 50    | 42  | 66  | 5   | 6   | 7      | 53   | 13    | 3      | 13      |
|                      | 25    | 26  | 39  | 3   | 3   | 4      | 32   | 8     | 2      | 9       |
|                      | 12.5  | 22  | 29  | 2   | 3   | 2      | 23   | 8     | 2      | 7       |
|                      | 6.25  | 15  | 23  | 2   | 3   | 3      | 19   | 6     | 1      | 6       |
| <b>VRC07-av2-c1</b>  | 50    | 12  | 9   | 5   | 4   | 7      | 5    | 45    | 11     | 11      |
|                      | 25    | 5   | 5   | 3   | 3   | 5      | 4    | 20    | 5      | 5       |
|                      | 12.5  | 4   | 5   | 2   | 2   | 2      | 3    | 13    | 3      | 4       |
|                      | 6.25  | 2   | 3   | 1   | 3   | 1      | 2    | 7     | 2      | 2       |
| <b>VRC07-av2-c2</b>  | 50    | 5   | 2   | 2   | 3   | 3      | 3    | 0     | 2      | 2       |
|                      | 25    | 2   | 5   | 3   | 1   | 2      | 3    | 2     | 1      | 2       |
|                      | 12.5  | 3   | 6   | 2   | 1   | 2      | 2    | 2     | 1      | 1       |
|                      | 6.25  | 2   | 1   | 3   | 2   | 1      | 2    | 2     | 1      | 2       |
| <b>VRC07-av2-c3</b>  | 50    | 89  | 126 | 36  | 15  | 33     | 102  | 53    | 13     | 32      |
|                      | 25    | 79  | 100 | 14  | 8   | 15     | 86   | 40    | 7      | 25      |
|                      | 12.5  | 69  | 86  | 10  | 8   | 11     | 72   | 34    | 5      | 22      |
|                      | 6.25  | 60  | 72  | 8   | 7   | 8      | 65   | 36    | 4      | 20      |
| <b>VRC07-av3-c1</b>  | 50    | 41  | 12  | 2   | 5   | 7      | 13   | 37    | 6      | 15      |
|                      | 25    | 23  | 11  | 2   | 3   | 4      | 8    | 25    | 4      | 9       |
|                      | 12.5  | 12  | 3   | 3   | 3   | 3      | 2    | 18    | 2      | 6       |
|                      | 6.25  | 9   | 4   | 2   | 3   | 4      | 5    | 19    | 2      | 4       |
| <b>VRC07-av3-c2</b>  | 50    | 3   | 5   | 3   | 2   | 4      | 2    | 11    | 2      | 3       |
|                      | 25    | 2   | 4   | 3   | 2   | 1      | 1    | 5     | 2      | 2       |
|                      | 12.5  | 1   | 3   | 3   | 3   | 1      | 2    | 7     | 1      | 2       |
|                      | 6.25  | 4   | 3   | 2   | 2   | 1      | 1    | 3     | 2      | 2       |
| <b>VRC07-av3-c3</b>  | 247   | 44  | 16  | 7   | 12  | 11     | 14   | 81    | 30     | 36      |
|                      | 127   | 24  | 9   | 4   | 8   | 8      | 6    | 49    | 15     | 23      |
|                      | 62    | 18  | 7   | 3   | 7   | 6      | 5    | 47    | 12     | 19      |
|                      | 34    | 13  | 7   | 4   | 6   | 5      | 5    | 41    | 8      | 14      |
| <b>VRC07-av3-c4</b>  | 50    | 54  | 24  | 10  | 13  | 13     | 16   | 117   | 62     | 64      |
|                      | 25    | 37  | 16  | 4   | 10  | 7      | 9    | 100   | 40     | 48      |
|                      | 12.5  | 19  | 8   | 3   | 6   | 5      | 6    | 59    | 25     | 28      |
|                      | 6.25  | 10  | 5   | 1   | 6   | 4      | 3    | 50    | 14     | 19      |

Reactivity of the control VRC07 variants with autoantigens was detected by the Luminex assay. SSA, Sjogren's syndrome antigen A; SSB, Sjogren syndrome antigen B; Sm, Smith antigen; RNP, ribonucleoprotein; Scl 70, scleroderma 70; Jo1, antigen; CentrB, centromere B. Values of greater than 125 are highlighted red.

**Table S8. Transitional temperatures of VRC07 variants determined by DSC.**

| <b>Antibody</b>     | <b>T<sub>m1</sub></b> | <b>T<sub>m2</sub></b> |
|---------------------|-----------------------|-----------------------|
| <b>VRC07</b>        | 70.92                 | Not Observed          |
| <b>VRC07-av1</b>    | 70.22                 | Not Observed          |
| <b>VRC07-av1-g1</b> | 70.16                 | Not Observed          |
| <b>VRC07-av1-g2</b> | 67.28                 | Not Observed          |
| <b>VRC07-av1-c1</b> | 68.65                 | Not Observed          |
| <b>VRC07-av1-c2</b> | 70.36                 | Not Observed          |
| <b>VRC07-av1-c3</b> | 65.36                 | 69.52                 |
| <b>VRC07-av2</b>    | 66.91                 | Not Observed          |
| <b>VRC07-av2-g1</b> | 60.12                 | 69.3                  |
| <b>VRC07-av2-g2</b> | 68.14                 | Not Observed          |
| <b>VRC07-av2-c1</b> | 68.41                 | Not Observed          |
| <b>VRC07-av2-c2</b> | 62.24                 | 68.92                 |
| <b>VRC07-av2-c3</b> | 69.46                 | Not Observed          |
| <b>VRC07-av3</b>    | 71.15                 | Not Observed          |
| <b>VRC07-av3-g1</b> | 65.51                 | 69.68                 |
| <b>VRC07-av3-c1</b> | 70.07                 | Not Observed          |
| <b>VRC07-av3-c2</b> | 66.84                 | Not Observed          |
| <b>VRC07-av3-c3</b> | 69.81                 | Not Observed          |
| <b>VRC07-av3-c4</b> | 71.15                 | Not Observed          |
